# Supplementary material for: A PA66 lamellar crystal film with excellent triboelectric performance in vertical contact separation mode
Source: Royal Society of Chemistry journal article supplement (doi:10.1039/d3tc02258g), 2023-01-01
Supplement: d3tc02258g1.pdf [file d3tc02258g1.pdf]

## Supporting Information

# A PA66 lamellae crystal film with excellent triboelectric performance in vertical contact separation mode

Jincheng Liu<sup>1,2</sup>, Po Ji<sup>1,2</sup>, Zixun Wang<sup>3</sup>, Xianglan Liu<sup>2</sup>, Yongxing Lin<sup>2,\*</sup>, Xiangyang Li<sup>2</sup>, Lin Chen<sup>2</sup>, Xingyou Tian<sup>2</sup>, Sihai Luo<sup>4,\*</sup>

<sup>1</sup> Institutes of Physical Science and Information Technology, Anhui University, Hefei, Anhui, 230601, People's Republic of China.

<sup>2</sup> Key Laboratory of Photovoltaic and Energy Conservation Materials, Institute of Solid State Physics, Hefei Institutes of Physical Science, Chinese Academy of Sciences, Hefei, Anhui, 230031, People's Republic of China.

<sup>3</sup> School of Materials Science and Engineering, Energy Materials and Devices Key Lab of Anhui Province for Photoelectric Conversion, Anhui University, Hefei, Anhui, 230601, People's Republic of China.

<sup>4</sup> Department of Chemistry, Norwegian University of Science and Technology (NTNU), 7491, Trondheim, Norway

\*Corresponding Authors: yxlin@issp.ac.cn, sihai.luo@ntnu.no.

**Fig. S1 Jincheng Liu et al.**

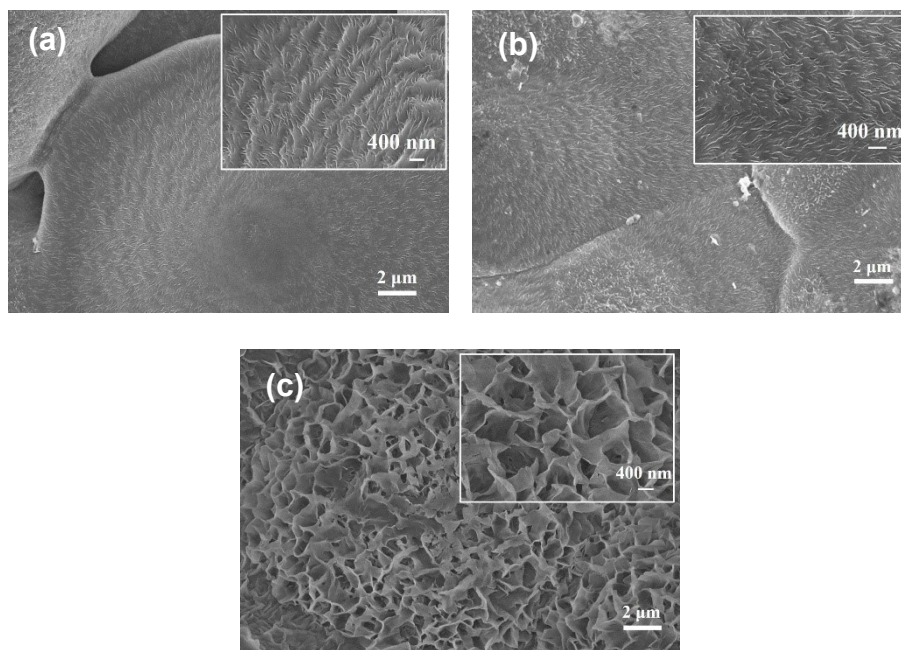

**Fig. S1** SEM images of the surface morphology of the PA66 films at different temperatures in 0.2 wt% PA66 incubation solution: (a) 120 °C, (b) 130 °C, and (c) 150 °C. Insets are local images with high magnification.

**Fig. S2 Jincheng Liu et al.**

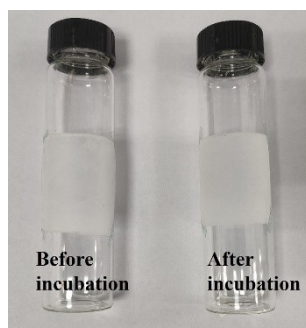

**Fig. S2** Photograph of PA66 spin-coated film before and after incubation.

**Fig. S3** Jincheng Liu et al.

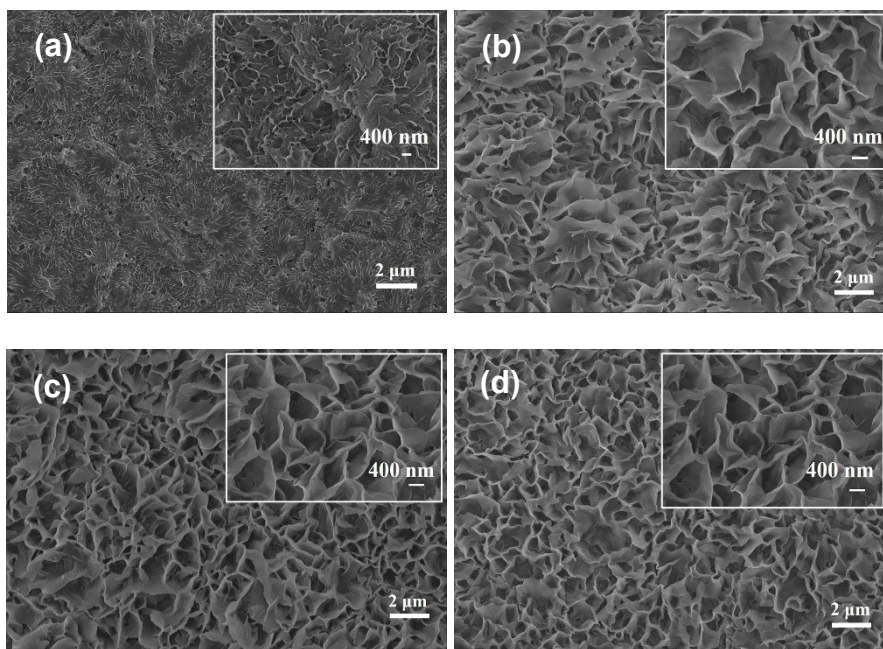

**Fig. S3** SEM images of the surface morphology of the PA66 films for different incubation times in 0.2 wt% PA66 incubation solution: (a) 10 min, (b) 1 h, (c) 1.5 h, and (d) 2 h. Insets are local images with high magnification.

**Fig. S4** Jincheng Liu et al.

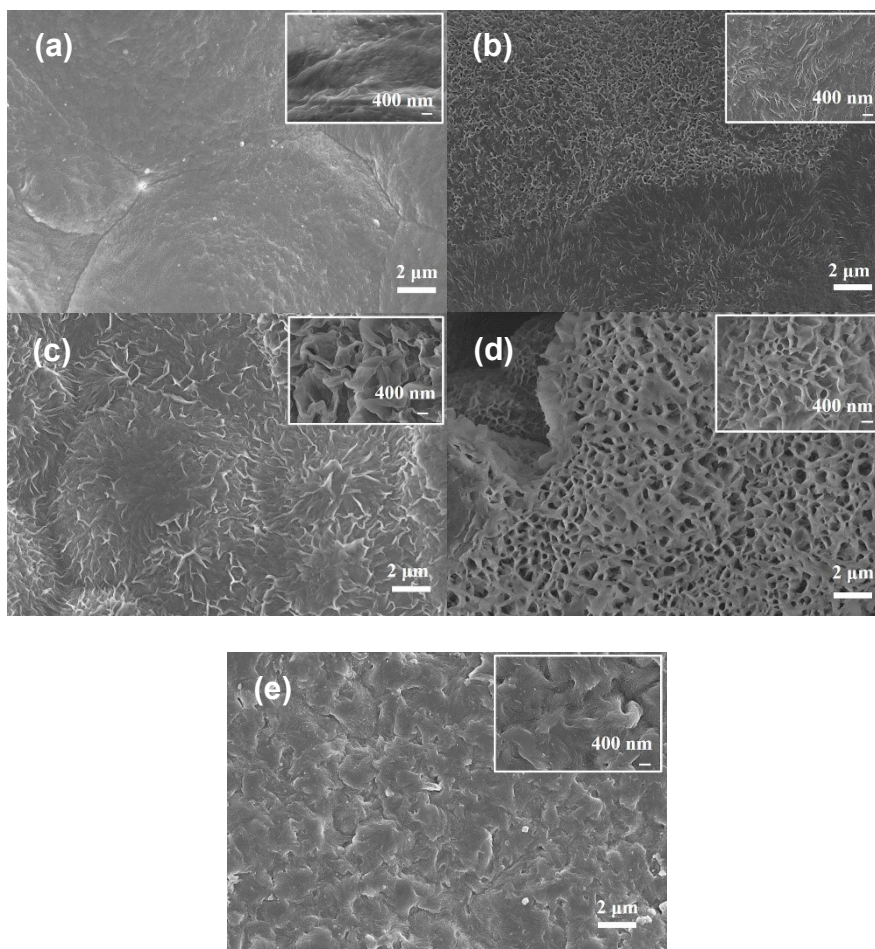

**Fig. S4** Surface SEM images of the PA66 films in different PA66 incubation solutions (140 °C, 30 min): (a) 0 wt%, (b) 0.01 wt%, (c) 0.05 wt%, (d) 0.1 wt%, and (e) 0.3 wt%. Insets are local images with high magnification.

**Table S1 Jincheng Liu et al.**

**Table S1** Crystallinity index data for the initial PA66 spin-coated film and structural PA66 film incubated at various concentrations.

| Samples      | Crystallinity/% |
|--------------|-----------------|
| Initial PA66 | 21.43           |
| 0.01 wt%     | 23.31           |
| 0.05 wt%     | 24.72           |
| 0.1 wt%      | 26.59           |
| 0.2 wt%      | 35.67           |
| 0.3 wt%      | 22.64           |

**Fig. S5** Jincheng Liu et al.

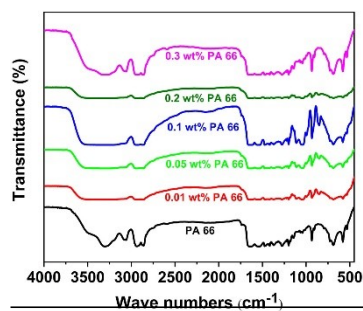

**Fig. S5** FTIR spectra of pure PA66 spin-coated film and PA66 lamellae-crystal films at various incubation concentrations.

**Fig. S6 Jincheng Liu et al.**

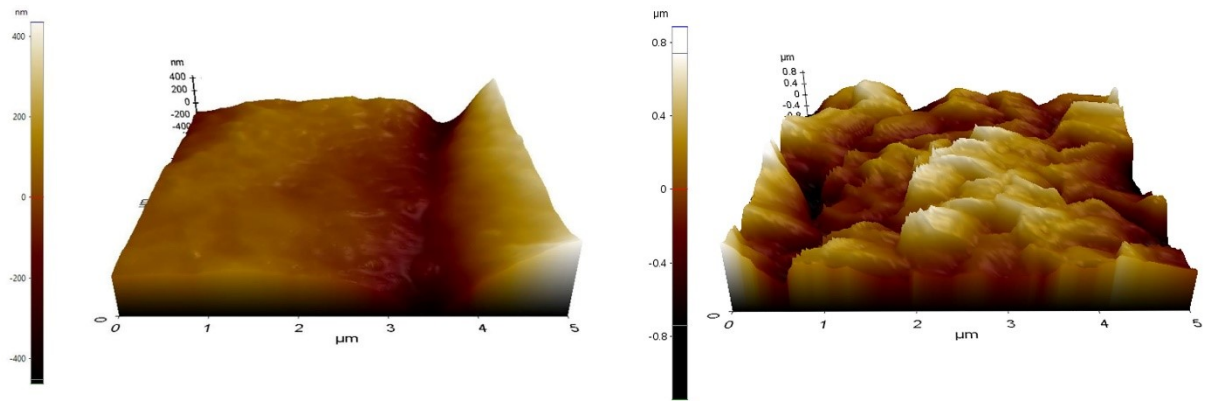

**Fig. S6** AFM images of (a) pure PA66 spin-coated film and (b) PA66 lamellae-crystal film.



**Fig. S7** Jincheng Liu et al.

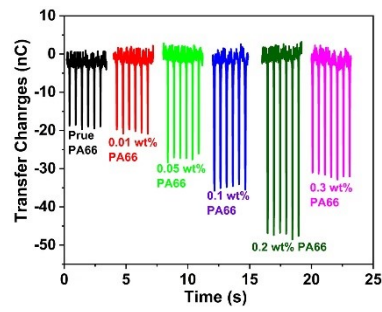

**Fig. S7** Transfer charge quantities of TENGs based on pure PA66 spin-coated film and PA66 lamellae-crystal structure films incubated in several incubation solution concentrations.

**Fig. S8 Jincheng Liu et al.**

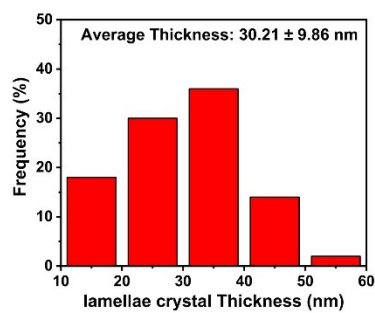

**Fig. S8** Histogram of the thickness distribution of the lamellae crystal.

**Fig. S9** Jincheng Liu et al.

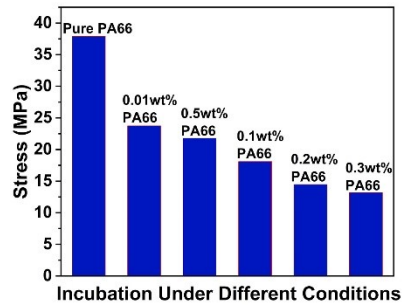

**Fig. S9** Stress of the initial PA66 spin-coated film and PA66 lamellae crystal films as a function of incubation concentrations.

**Fig. S10** Jincheng Liu et al.

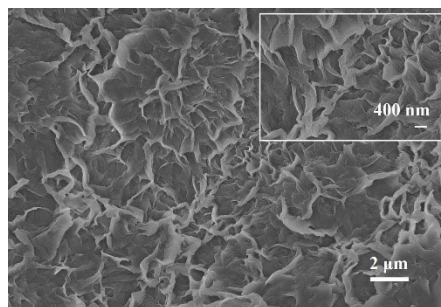

**Fig. S10** The surface morphology of PA66 lamellae crystal film after 10,000 seconds of impact at 2 Hz.

**Table S2 Jincheng Liu et al.**

**Table S2** LC-TENG performance compared to previously reported triboelectric nanogenerators.

| Reference | Materials<br>(Friction Layers)                                             | Output<br>Voltage (V) | Output<br>Current<br>( $\mu\text{A}$ ) | Power<br>Density<br>( $\text{W}/\text{m}^2$ ) | Tapping<br>force<br>(N) | Sensitivity<br>(V/F) | Operation<br>frequency<br>(Hz) |
|-----------|----------------------------------------------------------------------------|-----------------------|----------------------------------------|-----------------------------------------------|-------------------------|----------------------|--------------------------------|
| (1)       | electrospun nylon<br>66-Silk & /PVDF-<br>PET                               | 101                   | 9.34                                   | 0.28                                          | 8                       | 121.625              | 8                              |
| (2)       | electrospun PA66<br>nanofiber &<br>electrospun<br>P(VDF-TrFE)<br>nanofiber | 166                   | 8.5                                    | 0.093                                         | 200                     | 0.83                 | 5                              |
| (3)       | PA66-Ag yarn &<br>PTFE-Ag yarn                                             | 32                    | 1.9                                    | 0.0075                                        | -                       | -                    | 3                              |
| (4)       | patterned PVDF<br>membranes and<br>patterned nylon<br>membranes            | ~120                  | ~6.0                                   | 0.23                                          | ~78.4                   | ~1.5306              | 2.85                           |
| (5)       | PA66/MWCNTs<br>nanofibers film &<br>electrospun PVDF<br>nanofibers film    | 142                   | 15.5                                   | 1.5                                           | 15                      | 9.4667               | 5                              |
| (6)       | nylon & Silicone<br>Rubber                                                 | 1170                  | 138                                    | 11.2                                          | 100                     | 11.7                 | 3                              |
| (7)       | electrospun PA66<br>nanofiber & Ni-                                        | 45                    | 0.77                                   | 0.0104                                        | 16.2                    | 2.7778               | -                              |

|                  |                                        |            |             |             |           |             |          |
|------------------|----------------------------------------|------------|-------------|-------------|-----------|-------------|----------|
|                  | MOF/PVDF                               |            |             |             |           |             |          |
|                  | nanofibers film                        |            |             |             |           |             |          |
| <b>This work</b> | <b>lamellae-crystal PA66 &amp; FEP</b> | <b>153</b> | <b>7.35</b> | <b>0.67</b> | <b>10</b> | <b>15.3</b> | <b>2</b> |

From the above obtained data, the sensitivity (S), which indicates the relationship between  $\Delta V$  (change in voltage) and  $\Delta F$  (change in force), can be calculated using the following formula,

$$S = \frac{\Delta V}{\Delta F}$$

Here,  $\Delta V$  represents the change in voltage, while  $\Delta F$  represents the change in force. By calculation, the sensitivity of the LC-TENG was determined to be 15.3 V/N. Table R2-1 shows a comparison between previously reported nylon-based sensors and those based on PA66 lamellae crystals. Although the previously reported nylon nanofiber-based triboelectric nanogenerator has shown great potential as a self-powered sensor, it has poor sensitivity. Addressing all, here we have fabricated PA66 lamellae crystal-based LC-TENG with enhanced sensitivity. This enhanced performance motivates the use of the fabricated LC-TENG as a self-powered sensor for motion, joint monitoring, etc.

## References

- (1) S. Bairagi, G. Khandelwal, X. Karagiorgis, S. Gokhool, C. Kumar, G. Min and D.M. Mulvihill, High-Performance Triboelectric Nanogenerators Based on Commercial Textiles: Electrospun Nylon 66 Nanofibers on Silk and PVDF on Polyester. *ACS Appl. Mater. Interfaces* 2022, **14**, 44591-44603.
- (2) X. Guan, B. Xu, M. Wu, T. Jing, Y. Yang and Y. Gao, Breathable, washable and wearable woven-structured triboelectric nanogenerators utilizing electrospun nanofibers for biomechanical energy harvesting and self-powered sensing. *Nano Energy* 2021, **80**, 105549.
- (3) S. Dong, F. Xu, Y. Sheng, Z. Guo, X. Pu and Y. Liu, Y. Seamlessly knitted stretchable comfortable textile triboelectric nanogenerators for E-textile power sources. *Nano Energy* 2020, **78**, 105327.
- (4) G. J. Choi, S. H. Baek and I. K. Park, Synergetic Enhancement of Triboelectric Nanogenerators' Performance Based on Patterned Membranes Fabricated by Phase-Inversion Process. *Physica. Status. Solidi. (a)* 2021, **218**, 2000829.
- (5) N. Sun, G. G. Wang, H. X. Zhao, Y.W. Cai, J. Z. Li, G. Z. Li, X. N. Zhang, B. L. Wang, J. C. Han, Y. Wang and Y. Yang, Waterproof, breathable and washable triboelectric nanogenerator based on electrospun nanofiber films for wearable electronics. *Nano Energy* 2021, **90**, 106639.
- (6) J. Qian, J. He, S. Qian, J. Zhang, X. Niu, X. Fan, C. Wang, X. Hou, J. Mu, W. Geng and X. Chou, A Nonmetallic Stretchable Nylon-Modified High Performance Triboelectric Nanogenerator for Energy Harvesting. *Adv. Funct. Mater.* 2019, **30**, 1907414.

(7) N. K. Das, M. Ravipati and S. Badhulika, Nickel Metal-Organic Framework/PVDF Composite Nanofibers based Self-Powered Wireless Sensor for Pulse Monitoring of Underwater Divers via Triboelectrically Generated Maxwell- Displacement Current. *Adv. Funct. Mater.* 2023, 2303288. DOI: 10.1002/adfm.202303288.
